# Supplementary material for: The Effectiveness of Tocilizumab in the Treatment of COVID-19 in Adults: A Meta-Analysis of Randomized Controlled Trials.
Source: Research Square preprint supplement (doi:10.21203/rs.3.rs-551091/v1), 2021-05-25
Supplement: Supplementary file 1 [file 7fcce0164c43e43e72e0eec7.xlsx]

## Sheet: Sheet1
Table 1. Characteristics of included studies in meta-analysis.
Authors	sutdy design	Country	Age	Comparions	No. of patients	Intervention/Tocilizumab	Follow up	Outcomes
			(mean±SD)		(male/total)		(days)
Hermine et al	open-label RCT	France	64.0(12.7)	Tocilizumab	44/63	8mg/kg on day 1 and on day 3 400mg	90	1.2.3.4.5.6.7.8.9.10
2020			63.3(11.3)	Control	44/67	was recommended if clnically indicated
Rosas I et al	double-blinded RCT	Canada, Denmark, France, Germany, Italy	60.9(14.6)	Tocilizumab	205/294	8mg/kg (maximum 800mg) followed	60	1.2.3.4.5.6.7.9.10
2020		Netherland, Uk, United States,Spain	60.6(13.7)	Control	101/144	by a second dose after 8-24h
Salvarani et al	open-label RCT	Itay	61.5(16.3)	Tocilizumab	40/60	8mg/kg (maximum 800mg) followed	30	1.5.6.7.10
2020			60.0(11.10)	Control	37/66	by a second dose after 12h
Salama et al	double-blinded RCT	United States, Mexico,	56.0(14.3)	Tocilizumab	150/249	8mg/kg (maximum 800mg) and followed	60	1.2.3.6.7.10
2020		Kenya, South Africa, Peru, or Brazil	55.6(14.9)	Control	73/128	by a seconde dose after 8-24h
Stonne et al	double-blinded RCT	USA	61.6(17.3)	Tocilizumab	96/161	a single dose of 8mg/kg (maximum 800mg)	28	1.2.3.6.7.9
2020			56.5(17.1)	Control	45/82
Veiga et al	open-label RCT	Brazil	57.4(15.7)	Tocilizumab	44/65	a single dose of 8mg/kg (maximum 800mg)	29	1.2.3.6.8.10
2021			57.5(13.5)	Control	44/64
Zhao et al	multicenter RCT	China	75(11.8)	Combination	6/14	400mg followed by a second dose after	60	3.6.10
2020			70(11)	favipiravir	5/7	24h
Wang et al	open-label RCT	China	63.5(9.6）	Tocilizumab	18/34	400mg followed by a second dose after	14	6.10
2021			63(11.1）	Control	15/31	24h
Horby et al	platform trial, RCT	UK	63.3(13.7)	Tocilizumab	1335/2022	6-8 mg/kg (maximum 800mg) followed	28	1.2.3
2021			63.9(13.6)	Control	1437/2094	by a second dose after 12-24h
Gordon et al	platform trial, RCT	UK, Netherland, Australia, New Zealand	61.5(12.5)	Tocilizumab	261/353	8mg/kg (maximum 800mg) followed by	90	1.2.3.4.6
2021		Ireland, Saudi Arabia	61.1(12.8)	Control	283/402	a second dose after 12-24h
Soin et al	open-label RCT	India	56(11.85)	Tocilizumab	76/91	6 mg/kg (maximum 480mg) followed by	30	1.2.5.6.10
2021			54(14.81)	Control	76/88	a second same dose between 12h to 7 days
Footnotes:
Outcomes:1.mortality at 28-30 day; 2.incidence of mechanical ventilation; 3.composite outcome of mechanical ventilation or death; 4.time to discharge;
5.incidence of ICU transfer; 6.serious adverse advents; 7. serious infection; 8. time to xoygen supply independency; 9. events of serious adverse advents; 10. non- serious adverse events.
Abberviations: RCT：randomized controlled trial; h: hour；ICU: intensive care unite
